# Supplementary material for: Ultrathin silicon nitride membrane with slit-shaped pores for high-performance separation of circulating tumor cells
Source: Royal Society of Chemistry journal article supplement (doi:10.1039/d2lc00703g), 2022-01-01
Supplement: d2lc00703g1.pdf [file d2lc00703g1.pdf]

## Supplementary Information

### **Ultrathin silicon nitride membrane with slit-shaped pores for high-performance separation of circulating tumor cells**

Ang Li <sup>a†</sup>, Xiaodong He <sup>a†</sup>, Jing Wu <sup>b</sup>, Juan Zhang <sup>a</sup>, Guoyong Xu <sup>c</sup>, Bing Xu <sup>d\*</sup>, Gang  
Zhao <sup>c\*</sup>, Zuojun Shen <sup>a,b\*</sup>

<sup>a</sup> Department of Clinical Laboratory, The First Affiliated Hospital of USTC, Division of Life Sciences and Medicine, University of Science and Technology of China, Hefei, Anhui, 230001, China

<sup>b</sup> Department of Clinical Laboratory, Anhui Provincial Hospital Affiliated to Anhui Medical University, Hefei, Anhui, 230001, China

<sup>c</sup> School of Engineering Science, University of Science and Technology of China, Hefei, Anhui, 230026, China

<sup>d</sup> School of Mechanical Engineering, Suzhou University of Science and Technology, Suzhou, 215009, China

† Equal contribution

\* E-mail: [xb022@ustc.edu.cn](mailto:xb022@ustc.edu.cn), [fvc@ustc.edu.cn](mailto:fvc@ustc.edu.cn), and [zuojunshen@ustc.edu.cn](mailto:zuojunshen@ustc.edu.cn)

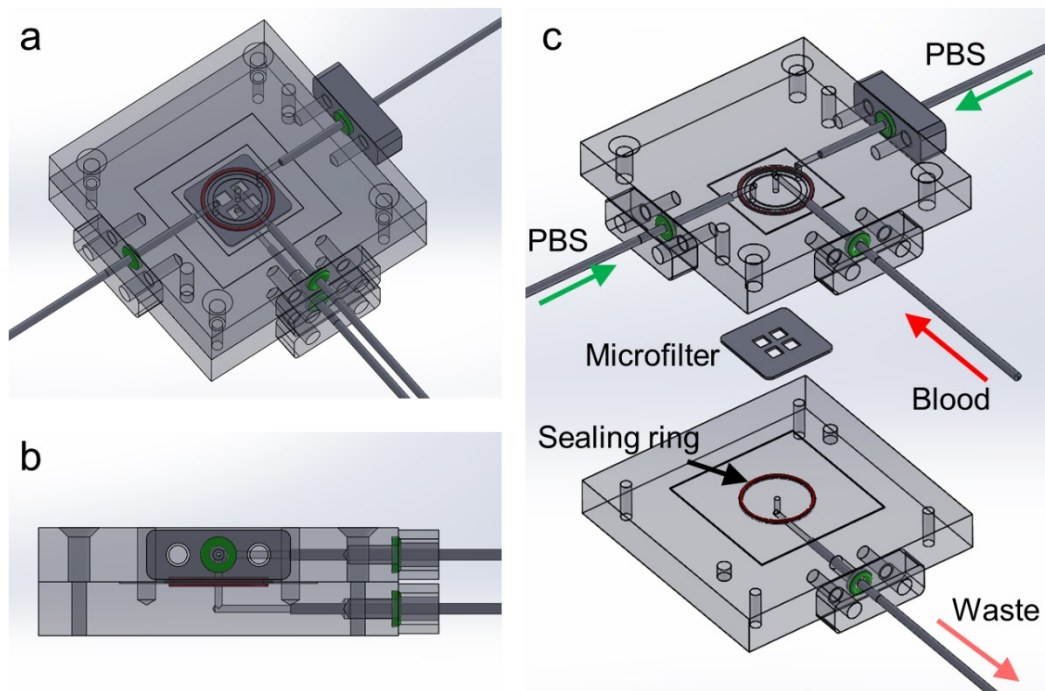

**Fig. S1** Schematic diagram of a microfluidic chip, containing a microfilter with  $\text{Si}_3\text{N}_4$  membrane and corresponding clamps. (a) The 45-degree view of the microfluidic chip. (b) Side view of the microfluidic chip. (c) The 3D exploded view of the microfluidic chip.

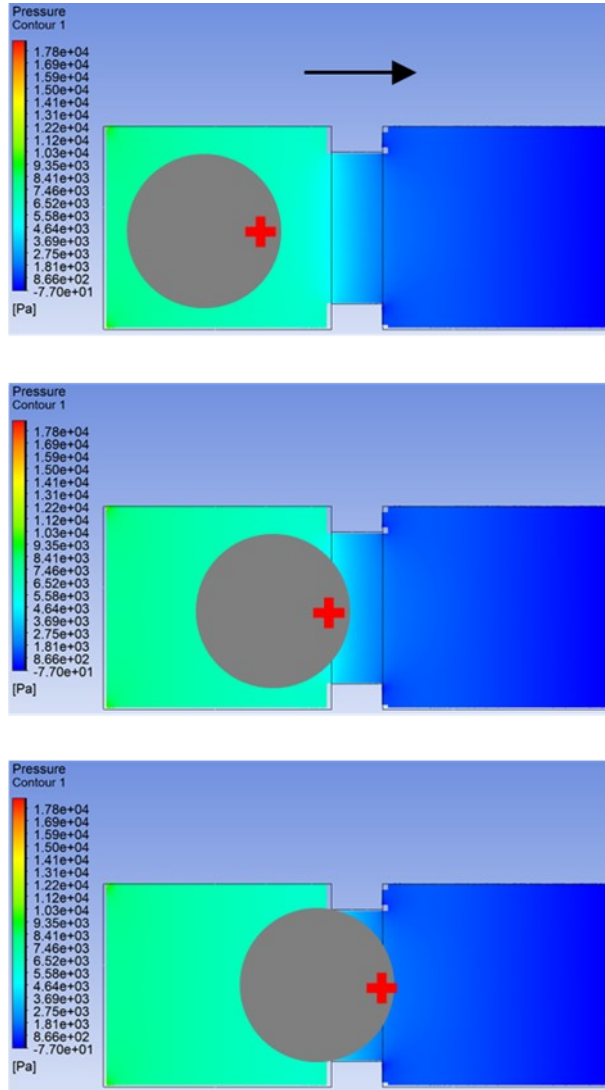

**Fig. S2** Schematic diagram of cancer cells flowing to the filtering pores and the changes in pressure drop. The grey color represents cancer cells, green background represents high pressure area, and blue background represents low pressure area. The largest pressure drop is created when the front side of cancer cells (marked in red) passes from the front of the filtering membrane (green background) to the back (blue background).

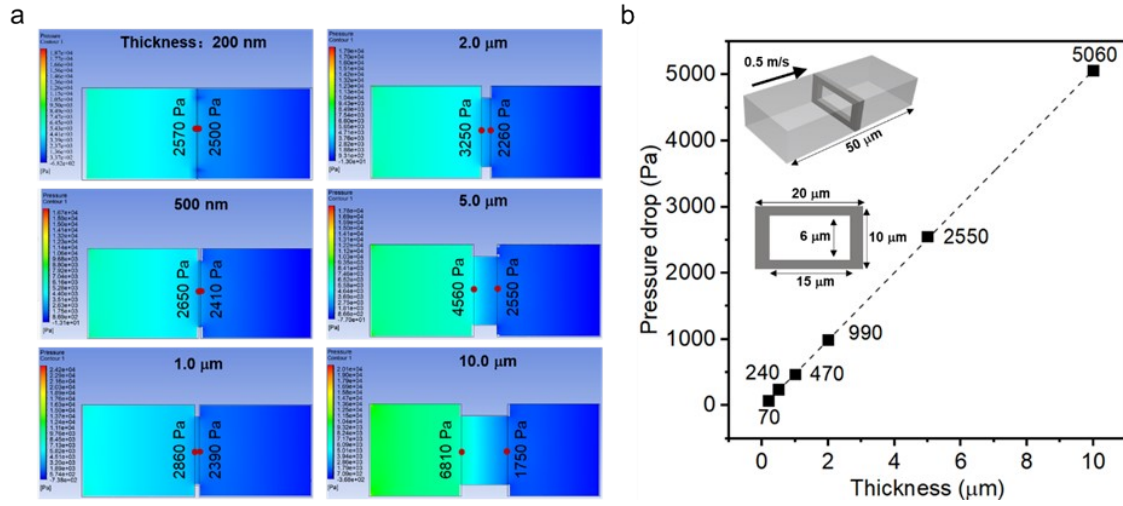

**Fig. S3** Effect of different thicknesses of membranes on the pressure drops on the cancer cells.

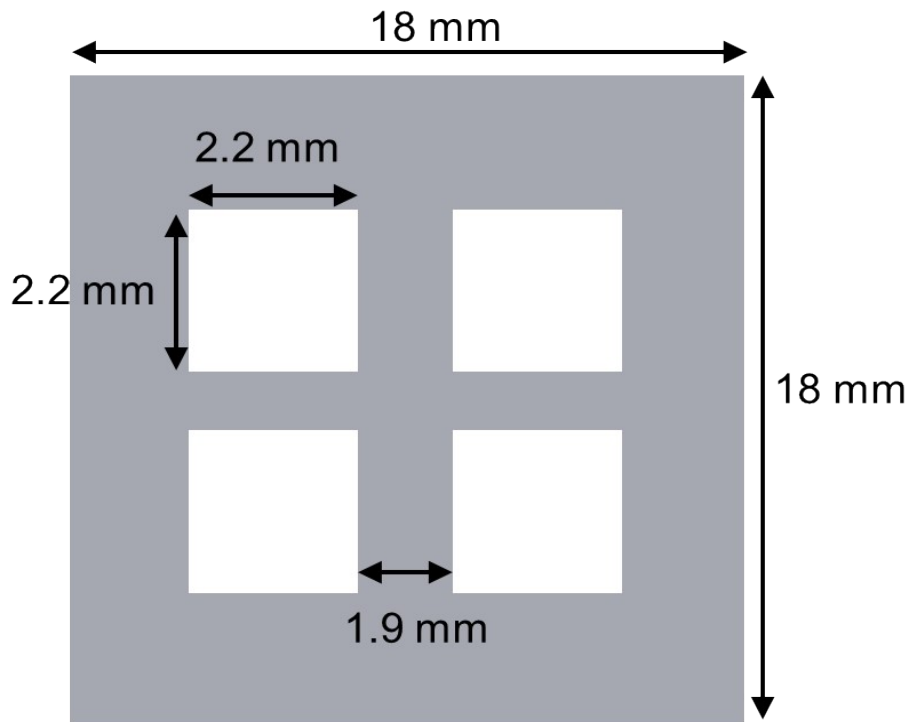

**Fig. S4** The whole filtering membrane size was 18 mm  $\times$  18 mm and contained four filtering regions. The size of each filtering region was 2.2 mm  $\times$  2.2 mm, and the distance between each region was 1.9 mm. The thickness of each filtering region was 200 nm.

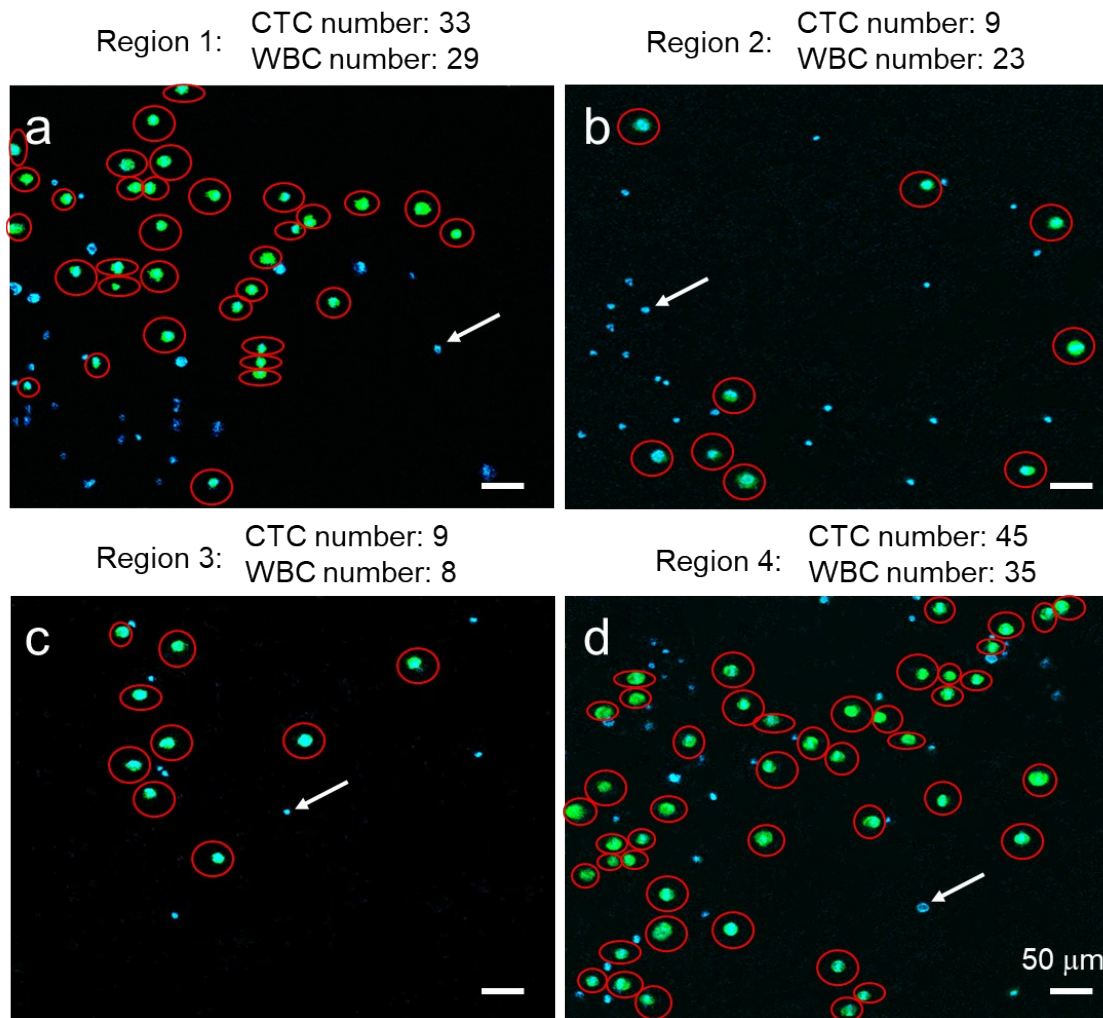

**Fig. S5** Manual counting of CTCs (Red circles, green/blue fluorescence) and WBCs (White arrows, blue fluorescent) in spiked blood experiments. (a) Region 1: CTC number: 33, WBC number: 29. (b) Region 2: CTC number: 9, WBC number: 23. (c) Region 3: CTC number: 9, WBC number: 8. (d) Region 4: CTC number: 45, WBC number: 35.

**Table S1** Assay information for EGFR mutation detection by Sanger sequencing

| Gene information | Sequence (5'-3')         | Size   |
|------------------|--------------------------|--------|
| EGFR-21-F        | AGGCGGAGGTCTTCATAAC      | 735 bp |
| EGFR-21-R        | CCACATGCAGATGGGACAG<br>G |        |

**Table S2** Quantification of CTCs in blood samples from cancer patients and healthy donors

| Patient ID | Gender | Age | Clinical Investigation                   | Sample Volume | CTC Counts |
|------------|--------|-----|------------------------------------------|---------------|------------|
| P1         | Male   | 74  | Lung cancer                              | 2 mL          | 11         |
| P2         | Male   | 84  | Lung cancer                              | 2 mL          | 10         |
| P3         | Female | 49  | Lung cancer with bone metastasis         | 2 mL          | 11         |
| P4         | Male   | 78  | Lung cancer with liver metastasis        | 2 mL          | 18         |
| P5         | Male   | 77  | Lung cancer                              | 2 mL          | 12         |
| P6         | Female | 75  | Rectal cancer with lymph node metastasis | 2 mL          | 15         |
| P7         | Male   | 51  | Colon cancer with liver metastasis       | 2 mL          | 9          |
| P8         | Male   | 53  | Colon cancer with lung metastasis        | 2 mL          | 17         |
| P9         | Female | 57  | Rectal cancer with liver metastasis      | 2 mL          | 20         |
| P10        | Female | 74  | Rectal cancer with liver metastasis      | 2 mL          | 6          |
| H1         | Male   | 29  | Healthy                                  | 2 mL          | 0          |
| H2         | Male   | 25  | Healthy                                  | 2 mL          | 0          |
| H3         | Female | 31  | Healthy                                  | 2 mL          | 0          |
| H4         | Female | 37  | Healthy                                  | 2 mL          | 0          |
| H5         | Male   | 54  | Healthy                                  | 2 mL          | 0          |



**Table S3** Patients' information of EGFR mutation

| Patient ID | Gender | Age | Cancer Type | Therapy                           | Gene Exon | Nucleotide Mutation |
|------------|--------|-----|-------------|-----------------------------------|-----------|---------------------|
| 1          | Female | 57  | Lung        | Chemotherapy and targeted therapy | EGFR-21   | G>A                 |
